# Supplementary material
Source: MDPI journal article supplement (https://www.mdpi.com/2227-9040/11/11/565)
Supplement: s1 [file s1]

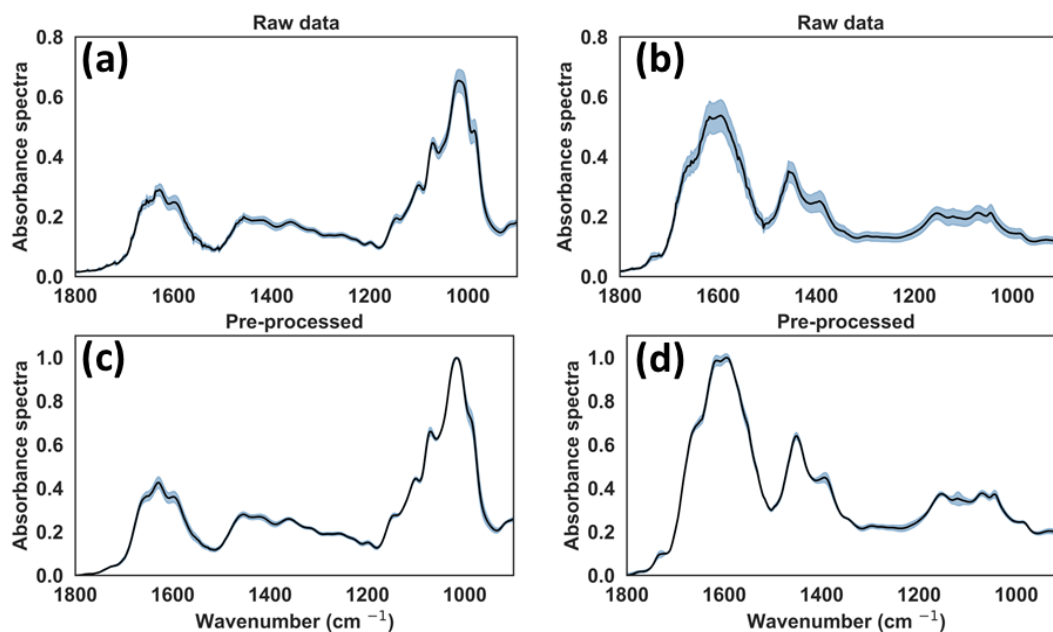

**Figure S1.** The data utilized in this study: Raw (a) of diabetes and (b) non-diabetes attributed to urine samples, as well as their respective pre-processed (c-d) data. The dataset is acquired using ATR-FTIR spectroscopy for both samples. Pre-processing is performed using Savitzky-Golay filter, smoothing (window 11, polynomial fitting order 2, derive=0) applied for baseline correction, following normalization and mean-center.

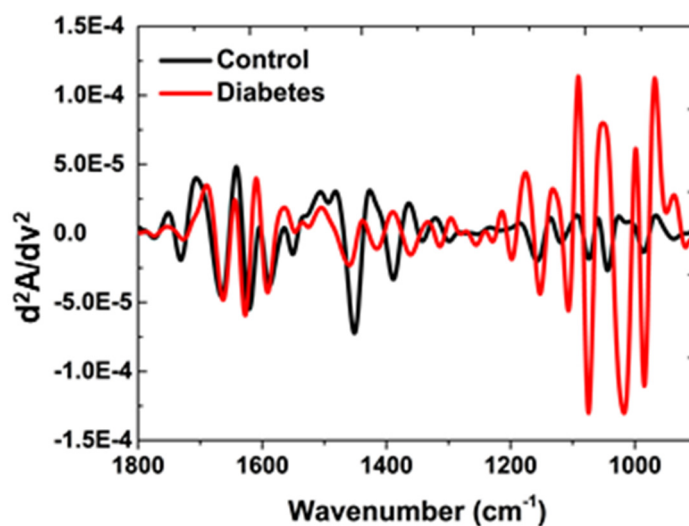

**Figure S2.** The second derivative plots of absorbance (A) for identification of spectral biomarkers in urine using Savitzky-Golay filter smoothing (window 11, polynomial fitting order 2, derive=2).
